# Supplementary material for: Applications of hydrothermal synthesis of Escherichia coli derived carbon dots in in vitro and in vivo imaging and p-nitrophenol detection
Source: Royal Society of Chemistry journal article supplement (doi:10.1039/c9an01753d), 2019-10-23
Supplement: c9an01753d1.pdf [file c9an01753d1.pdf]

## Applications of hydrothermal synthesis of *Escherichia coli* derived carbon dots in vitro and in vivo imaging and *p*-nitrophenol detection

Kunhao Qin<sup>a, b#</sup>, Dongfang Zhang<sup>b#</sup>, Yafang Ding<sup>b</sup>, Xiaodan Zheng<sup>b</sup>, Yingying Xiang<sup>c</sup>, Jianhao Hua<sup>b</sup>,  
Qi Zhang<sup>b</sup>, Xiuling Ji<sup>b</sup>, Bo Li<sup>d</sup>, Yunlin Wei<sup>b\*</sup>

<sup>a</sup> Post-doctoral Research Station in Geological Resources and Geological Engineering, Faculty of Land Resource Engineering, Kunming University of Science and Technology, Kunming 650500, China

<sup>b</sup> Faculty of Life Science and Technology, Kunming University of Science and Technology, Kunming 650500, China

<sup>c</sup> Department of Stomatology, Yan'an Hospital Affiliated to Kunming Medical University, Kunming 650031, China

<sup>d</sup> Faculty of Land Resource Engineering, Kunming University of Science and Technology, Kunming 650500, China

#. These authors have contributed equally to this work.

\*. Corresponding author: weiyunlin18@163.com.

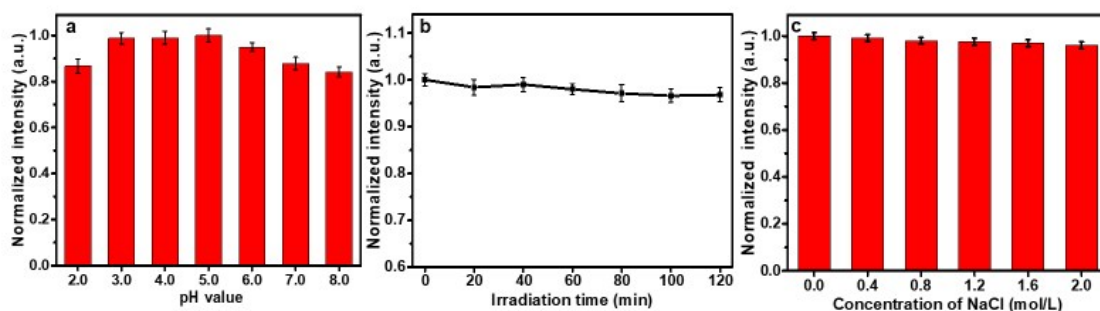

**Fig. S1** (a) The fluorescence intensity of CDs-WT varying with the sample pH value from 2 to 8. (b) Normalized fluorescence intensity of CDs-WT under UV (365 nm) irradiation for 2 h. (c) Normalized fluorescence intensity of CDs-WT in different NaCl concentrations ranging from 0 to 2 M.

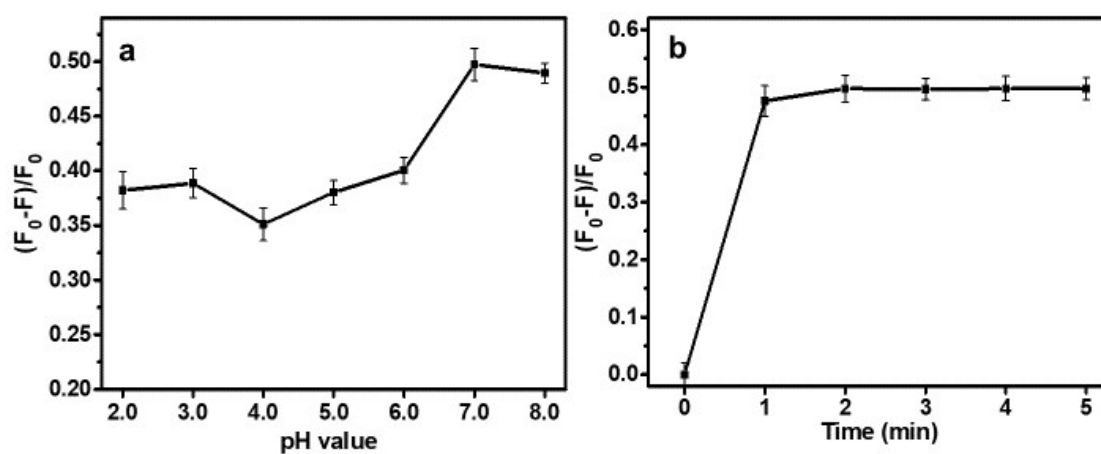

**Fig. S2** Effect of (a) sample pH value and (b) reaction time on the detection of *p*-NP with CDs-WT.

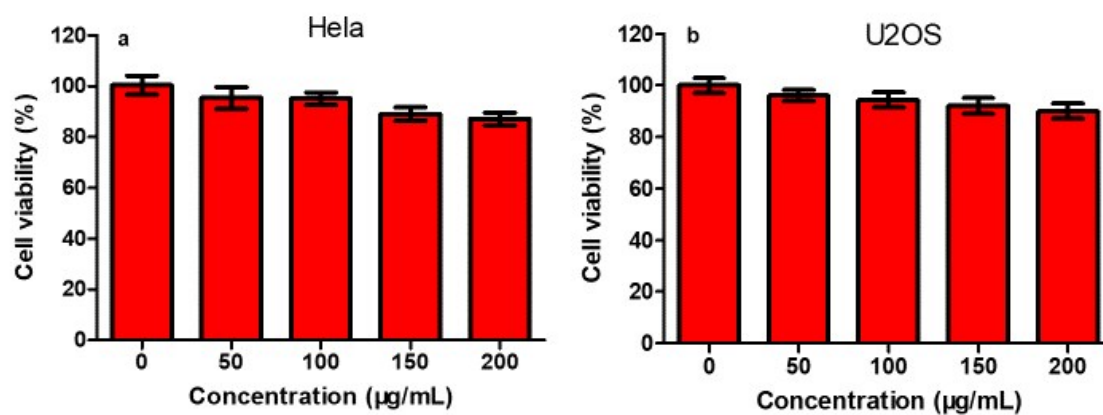

**Fig. S3** Helo (a) and U2OS (b) cell viability from MTT assays with different CDs-WT concentration after 24 h incubation

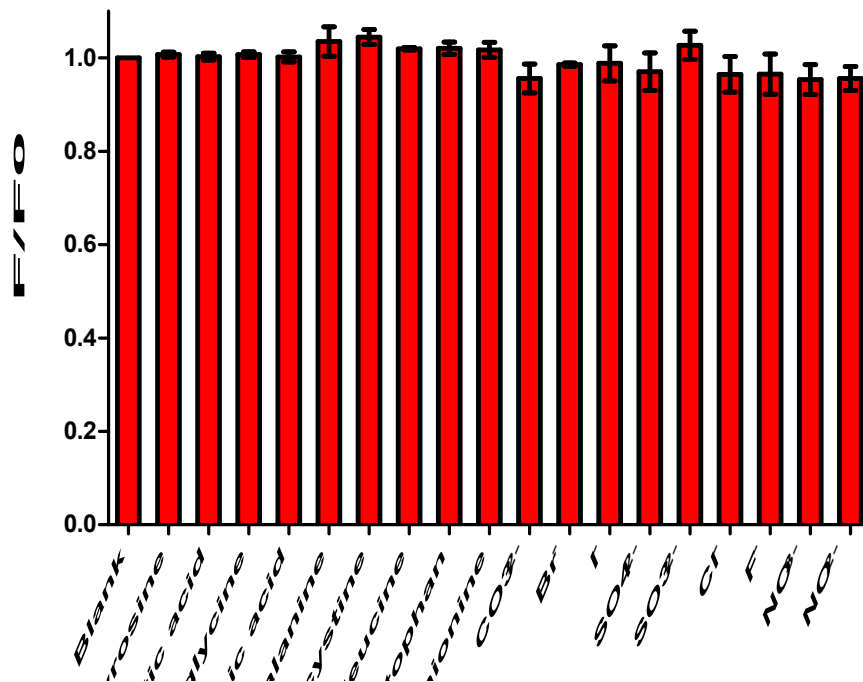

**Fig. S4** Fluorescence quenching efficiency of amino acids (30  $\mu$ M) and common anions (30  $\mu$ M) toward CDs-WT.
